# High Concentrations of Tranexamic Acid Inhibit Ionotropic Glutamate Receptors

Irene Lecker, Ph.D., Dian-Shi Wang, M.D., Ph.D., Kirusanthy Kaneshwaran, B.S.,  
C. David Mazer, M.D., Beverley A. Orser, M.D., Ph.D.

## ABSTRACT

**Background:** The antifibrinolytic drug tranexamic acid is structurally similar to the amino acid glycine and may cause seizures and myoclonus by acting as a competitive antagonist of glycine receptors. Glycine is an obligatory co-agonist of the *N*-methyl-D-aspartate (NMDA) subtype of glutamate receptors. Thus, it is plausible that tranexamic acid inhibits NMDA receptors by acting as a competitive antagonist at the glycine binding site. The aim of this study was to determine whether tranexamic acid inhibits NMDA receptors, as well as  $\alpha$ -amino-3-hydroxy-5-methyl-4-isoxazolepropionic acid and kainate subtypes of ionotropic glutamate receptors.

**Methods:** Tranexamic acid modulation of NMDA,  $\alpha$ -amino-3-hydroxy-5-methyl-4-isoxazolepropionic acid, and kainate receptors was studied using whole cell voltage-clamp recordings of current from cultured mouse hippocampal neurons.

**Results:** Tranexamic acid rapidly and reversibly inhibited NMDA receptors (half maximal inhibitory concentration =  $241 \pm 45$  mM, mean  $\pm$  SD; 95% CI, 200 to 281;  $n = 5$ ) and shifted the glycine concentration–response curve for NMDA-evoked current to the right. Tranexamic acid also inhibited  $\alpha$ -amino-3-hydroxy-5-methyl-4-isoxazolepropionic acid receptors (half maximal inhibitory concentration =  $231 \pm 91$  mM; 95% CI, 148 to 314;  $n = 5$  to 6) and kainate receptors (half maximal inhibitory concentration =  $90 \pm 24$  mM; 95% CI, 68 to 112;  $n = 5$ ).

**Conclusions:** Tranexamic acid inhibits NMDA receptors likely by reducing the binding of the co-agonist glycine and also inhibits  $\alpha$ -amino-3-hydroxy-5-methyl-4-isoxazolepropionic acid and kainate receptors. Receptor blockade occurs at high millimolar concentrations of tranexamic acid, similar to the concentrations that occur after topical application to peripheral tissues. Glutamate receptors in tissues including bone, heart, and nerves play various physiologic roles, and tranexamic acid inhibition of these receptors may contribute to adverse drug effects. (ANESTHESIOLOGY 2017; 127:89-97)

TRANEXAMIC ACID (TXA) is an antifibrinolytic drug that is used widely to reduce blood loss resulting from a variety of hemorrhagic causes, including trauma, postpartum hemorrhage, and surgical procedures.<sup>1-8</sup> TXA is a synthetic analog of the endogenous amino acid lysine, which binds to the lysine binding site of plasminogen.<sup>9</sup> TXA blocks the conversion of plasminogen to plasmin and the degradation of fibrin blood clots, thereby producing hemostatic effects.<sup>9</sup>

TXA is administered either systemically or topically. Systemic administration to patients by intravenous injection produces concentrations in the cerebrospinal fluid of 30 to 200  $\mu$ M and plasma of 0.6 to 2 mM.<sup>7,10-14</sup> In contrast, topical application of TXA directly to peripheral tissues during some surgical procedures would produce high localized concentrations (0.7 to 100 mg/ml, equivalent to 5 to 600 mM).<sup>2</sup> Topical application of TXA is becoming increasingly popular, as this method may reduce bleeding and produce fewer side effects than systemic administration.<sup>2</sup> Plasma

### What We Already Know about This Topic

- The antifibrinolytic drug tranexamic acid may cause seizures by acting as a competitive antagonist of glycine receptors.
- Glycine is an obligatory co-agonist of the *N*-methyl-D-aspartate receptors found in the brain and peripheral tissues.

### What This Article Tells Us That Is New

- Tranexamic acid inhibits *N*-methyl-D-aspartate receptors likely by reducing the binding of the co-agonist glycine and also inhibits other ionotropic glutamate receptors. Receptor blockade only occurs at high concentrations, similar to those that occur after topical application to peripheral tissues.
- Inhibition of glutamate receptors in peripheral tissues may contribute to adverse effects observed at high concentrations.

concentrations after topical application generally are less than one tenth of the level after intravenous administration.<sup>2,15-17</sup>

TXA inhibition of receptors other than plasminogen may cause adverse effects including seizures and myoclonus.<sup>14,18,19</sup> TXA is structurally similar to the inhibitory

Corresponding article on page 6. This is a Coagulation 2016 article. I.L. and D.-S.W. contributed equally to this article.

Submitted for publication July 29, 2016. Accepted for publication March 31, 2017. From the Departments of Physiology (I.L., D.-S.W., K.K., C.D.M., B.A.O.) and Anesthesia (C.D.M., B.A.O.), University of Toronto; Department of Anesthesia, Keenan Research Centre for Biomedical Science and the Li Ka Shing Knowledge Institute, St. Michael's Hospital (C.D.M.); and Department of Anesthesia, Sunnybrook Health Sciences Centre (B.A.O.), Toronto, Ontario, Canada.

Copyright © 2017, the American Society of Anesthesiologists, Inc. Wolters Kluwer Health, Inc. All Rights Reserved. Anesthesiology 2017; 127:89-97

neurotransmitter glycine and acts as a competitive antagonist at glycine receptors.<sup>14</sup> Concentrations of TXA in the low millimolar range reduce inhibitory neurotransmission (or disinhibition), which causes network hyperexcitability and seizure-like events in animal models.<sup>14,19–21</sup>

The effects of TXA on the major subtypes of excitatory ionotropic glutamate receptors that also modify brain network excitability have not been elucidated fully. These receptor subtypes include *N*-methyl-D-aspartate (NMDA) receptors,  $\alpha$ -amino-3-hydroxy-5-methyl-4-isoxazolepropionic acid (AMPA) receptors, and kainate receptors.<sup>22</sup> TXA modulation of NMDA receptors is of particular interest because these receptors contain a high-affinity glycine binding site.<sup>23</sup> Binding of both glutamate and glycine is required for full activation of the NMDA receptors, and drugs that inhibit glycine binding reduce NMDA receptor function.<sup>24</sup> TXA could compete with glycine at the glycine binding of the NMDA receptor and thereby reduce receptor function. Others have shown that TXA, at low concentrations (1 to 5 mM), does not inhibit excitatory synaptic currents in amygdala slices.<sup>25</sup> However, the effects of high concentrations of TXA on glutamate receptors, such as those that occur during topical application, have not been elucidated. Glutamate receptors are expressed widely in peripheral tissues, including bone, heart, pancreas, and nerves, where they serve diverse physiologic roles.<sup>26–32</sup> Thus, it is of interest to determine whether TXA blocks ionotropic glutamate receptors.

For these proof-of-concept studies, currents generated by NMDA, AMPA, and kainate receptors were recorded from hippocampal neurons. The rationale is that these cells express high levels of ionotropic glutamate receptors,<sup>33</sup> and receptors in hippocampal neurons and peripheral tissues have similar structural, physiologic, and pharmacologic properties.<sup>26,28,31</sup> The results show that TXA reduces NMDA receptor function by acting as a competitive antagonist at the glycine binding site. Surprisingly, TXA also inhibits AMPA and kainate receptors. These results predict that TXA at high concentrations, applied topically to peripheral tissues, inhibits ionotropic glutamate receptors.

## Materials and Methods

### Cell Culture

All experimental procedures were approved by the Animal Care Committee of the University of Toronto (Toronto, Ontario, Canada). Primary cultures of hippocampal neurons were prepared from Swiss White mice (Charles River, Canada) as previously described.<sup>34</sup> In brief, fetal pups (embryonic day 18) were removed from maternal mice that had been euthanized by cervical dislocation. The hippocampi of each fetus were collected and placed on an ice-cooled culture dish. Neurons were then dissociated by mechanical trituration with a Pasteur pipette (tip diameter 150 to 200  $\mu$ m) and plated on 35-mm culture dishes. The culture dishes were coated with collagen or poly-D-lysine (Sigma-Aldrich, Canada). The density of neurons per culture dish

was approximately  $1 \times 10^6$  cells. Two hours later, the medium was changed to a neurobasal medium supplemented with 2% B27 and 1% GlutaMAX (Life Technologies, USA). The medium was changed every 3 days. The low-density dissociated neurons were maintained in culture for 14 to 20 days before use. At this point in time, hippocampal neurons become appropriately polarized, develop extensive axonal and dendritic arbors, and form numerous, functional synaptic connections with one another, which resemble mature hippocampal neurons *in vivo*.<sup>35</sup> Culture dishes were prepared from at least two different mice for each experiment, and a maximum of two cells was recorded from each dish.

### Whole Cell Voltage-clamp Recordings

Whole cell currents were recorded under voltage-clamp (–60 mV) conditions with an Axopatch 1D amplifier (Molecular Devices, USA) controlled with pClamp 8.0 software (Molecular Devices) *via* a Digidata 1322A interface (Molecular Devices). Patch pipettes with open-tip resistances of 2 to 3 M $\Omega$  were pulled from thin-walled borosilicate glass capillary tubes. Patch electrodes were filled with an intracellular solution containing (in mM) 140 cesium chloride, 10 HEPES, 11 EGTA, 2 magnesium chloride, 1 calcium chloride, 4 magnesium adenosine triphosphate, and 2 triethanolamine (adjusted to pH 7.3 with cesium hydroxide and to 285 to 295 mOsm with water). To record NMDA-evoked current, magnesium-free extracellular solution was used and contained (in mM) 140 sodium chloride, 1.3 calcium chloride, 2 potassium chloride, 25 HEPES, and 28 glucose (adjusted to pH 7.4 with sodium hydroxide and to 320 to 330 mOsm with water). To record AMPA- and kainate-evoked current, magnesium chloride (1 mM) was added to the extracellular solution. Tetrodotoxin (300 nM) was added to the extracellular solution to block voltage-sensitive sodium channels. A computer-controlled, multibarrelled perfusion system (SF-77B; Warner Instruments, USA) was used to apply the extracellular solution to neurons. The time interval between applications of agonists, including NMDA, AMPA, and kainate, was 2 min. This interval was sufficient to allow receptors to recover from desensitization. No randomization methods were applied. Currents were recorded before and during the application of TXA, and the experimenters were not blinded to the drug application conditions.

### Drugs

TXA, NMDA, AMPA, kainate, and glycine were obtained from Sigma-Aldrich. Tetrodotoxin was purchased from Alomone Labs (Israel). Stock solutions of these reagents were prepared with distilled water.

### Data Analysis

Currents were analyzed with pClamp 10 software (Molecular Devices). The concentration–response plots were fitted to the modified Michaelis–Menten equation:  $I = I_{\max} / [1 + (EC_{50}/c)^{nH}]$ , where  $I$  is the current amplitude,  $EC_{50}$  is the concentration of agonist that produces currents with 50%

of the maximal amplitude,  $c$  is the concentration of agonist, and  $nH$  is the estimated Hill coefficient. The concentration–response plots for TXA inhibition were fitted to the following equation:  $I = (IC_{50})^{nH} / [c^{nH} + (IC_{50})^{nH}]$ , where  $IC_{50}$  is the concentration of TXA that inhibited 50% of the current amplitude.

### Statistical Analyses

No statistical power calculation was conducted before the study, and the sample size was based on our previous experience with this experimental design. There were no missing data from the results presented in this manuscript. Results are presented as mean  $\pm$  SD together with 95% CI of the mean. Statistical analysis was performed with GraphPad Prism 5 software (GraphPad Software Inc., USA). Differences between groups were determined with the Student's  $t$  test or a one-way ANOVA with a Dunnett multiple-comparison *post hoc* test. A two-tailed hypothesis test was used, and any  $P$  value less than 0.05 was considered significant.

## Results

### High Concentrations of TXA Inhibit NMDA Receptors

We first identified the concentration of NMDA that evoked 50% of the maximal current ( $EC_{50}$ ) in hippocampal neurons as this information was used to design studies that examined TXA inhibition of NMDA receptors. Application of NMDA (3 to 3,000  $\mu$ M) rapidly activated inward current, which increased in amplitude with increasing concentrations of NMDA in the presence of glycine (1  $\mu$ M). The

concentration–response plot for NMDA-evoked current revealed an  $EC_{50}$  value of  $98 \pm 44$   $\mu$ M (95% CI, 51 to 146;  $n = 4$ ; fig. 1A).

Next, to study the inhibitory effects of TXA on NMDA receptors, NMDA was applied at a concentration close to the  $EC_{50}$  value (100  $\mu$ M) together with glycine (1  $\mu$ M), in the absence or presence of TXA. Low concentrations of TXA (1 mM, 3 mM) had no effect on the amplitude of the peak current. However, higher TXA concentrations (10 mM or greater) rapidly and reversibly inhibited the NMDA-evoked current (fig. 1B). TXA at the threshold concentration (10 mM) inhibited the NMDA current by  $4.2 \pm 5.4\%$  (95% CI,  $-0.5$  to  $8.9$ ;  $n = 5$ ), and the maximum inhibition at 3 mM was  $97.1 \pm 1.8\%$  (95% CI, 95.5 to 98.7;  $n = 5$ ). The concentration–response plot showed that the concentration of TXA required to inhibit 50% of the maximal peak current ( $IC_{50}$ ) was  $241 \pm 45$  mM (95% CI, 200 to 281;  $n = 5$ ).

### TXA Is a Competitive Antagonist at the Glycine Binding Site

To further probe the hypothesis that TXA decreases NMDA receptor function by competitively inhibiting glycine binding, we next examined the inhibitory effects of TXA (100 mM) on current evoked by NMDA (100  $\mu$ M) with different concentrations of glycine in the extracellular solution. The extent of TXA-mediated inhibition decreased with increasing concentrations of glycine (fig. 2A), and a near-saturating concentration of glycine almost completely abolished TXA inhibition of NMDA-evoked current. Specifically, TXA inhibited NMDA currents by  $59.1 \pm 23.2\%$

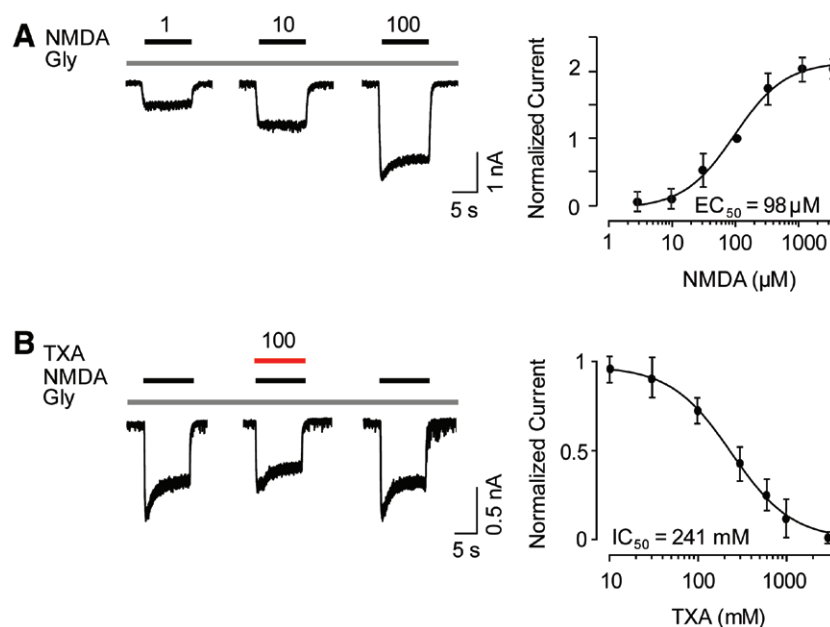

**Fig. 1.** TXA inhibits *N*-methyl-D-aspartate (NMDA)-evoked currents in hippocampal neurons. (A) Representative traces showing currents evoked by increasing concentrations of NMDA and the corresponding concentration–response plot ( $n = 4$ ). (B) Representative traces and the corresponding concentration–response plot ( $n = 5$ ) showing the inhibitory effects of tranexamic acid (TXA) on currents activated by NMDA (100  $\mu$ M). Glycine (1  $\mu$ M) was present continuously in the bath. All data are presented as mean  $\pm$  SD.

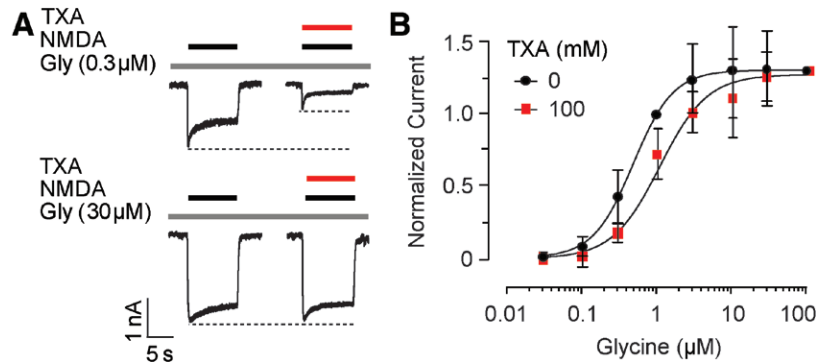

**Fig. 2.** Tranexamic acid (TXA) inhibition of *N*-methyl-D-aspartate (NMDA)-evoked currents decreases with increased glycine concentration. (A) Representative traces demonstrating decreased TXA (100 mM) inhibition of currents evoked by NMDA (100 μM) with an increased glycine concentration. (B) Glycine concentration–response plots for currents evoked by NMDA (100 μM) in the absence and presence of TXA. Glycine half maximal effective concentration was increased from  $0.48 \pm 0.09$  μM (95% CI, 0.43 to 0.53) without TXA to  $0.95 \pm 0.19$  μM (95% CI, 0.81 to 1.1) with TXA ( $P = 0.02$ , unpaired one-tailed Student's *t* test). All responses were normalized to the peak current evoked by NMDA (100 μM) and glycine (1 μM) without TXA. The sample sizes in the absence and presence of TXA were  $n = 10$  and  $n = 8$ , respectively. All data are presented as mean  $\pm$  SD.

(95% CI, 43.0 to 75.2;  $n = 8$ ) in the presence of 0.3 μM glycine but by only  $2.2 \pm 3.7\%$  (95% CI,  $-0.4$  to 4.8;  $n = 8$ ) when the glycine concentration was increased to 30 μM. We next constructed glycine (0.03 to 100 μM) concentration–response plots for NMDA current, recorded in the absence and presence of TXA (fig. 2B). TXA shifted the glycine concentration–response curve to the right without changing the maximum response. The glycine EC<sub>50</sub> increased from  $0.48 \pm 0.09$  μM (95% CI, 0.43 to 0.53;  $n = 10$ ) to  $0.95 \pm 0.19$  μM (95% CI, 0.81 to 1.1;  $n = 8$ ) in the presence of TXA ( $P = 0.02$ ), whereas the Hill coefficient was unchanged (control  $1.5 \pm 0.6$ ; 95% CI, 1.1 to 1.9;  $n = 10$  vs. TXA  $1.6 \pm 0.3$ ; 95% CI, 1.5 to 1.7;  $n = 8$ ,  $P = 0.9$ ). These results are consistent with the hypothesis that TXA inhibits NMDA receptors by acting as a competitive antagonist at the glycine binding site.

The binding sites of NMDA and glycine interact allosterically such that glycine affinity increases with the binding of NMDA and, conversely, NMDA affinity increases with the binding of glycine.<sup>36,37</sup> These allosteric interactions predict that TXA blockade should decrease with increasing concentrations of NMDA (because of increased glycine binding). To

test this prediction, the inhibitory effects of TXA (100 mM) on NMDA currents were studied under conditions in which the concentration of NMDA was varied whereas the concentration of glycine (1 μM) was fixed (fig. 3). For NMDA 1, 10, and 100 μM, TXA inhibited the currents by  $66.1 \pm 10.3\%$  (95% CI, 57.9 to 74.3),  $48.3 \pm 12.7\%$  (95% CI, 38.1 to 58.5), and  $26.4 \pm 2.5\%$  (95% CI, 24.6 to 28.6), respectively ( $n = 6$ ). As predicted, TXA inhibition decreased with increasing concentrations of NMDA.

### Inhibition by TXA Is Not Use Dependent or Voltage Dependent

TXA inhibition should exhibit no use or voltage dependence if it acts as a competitive antagonist at the glycine binding site, rather than as a noncompetitive blocker of the open channel pore.<sup>38</sup> The extent of TXA (100 mM) inhibition was similar after repeated application of NMDA and TXA (fig. 4A), suggesting the block is not use dependent. Next, the concentration of TXA in the extracellular solution was increased to 300 mM (close to IC<sub>50</sub> value). Neurons were perfused continuously with this solution. Three sequential applications of NMDA (100 μM) showed that inhibition of three current

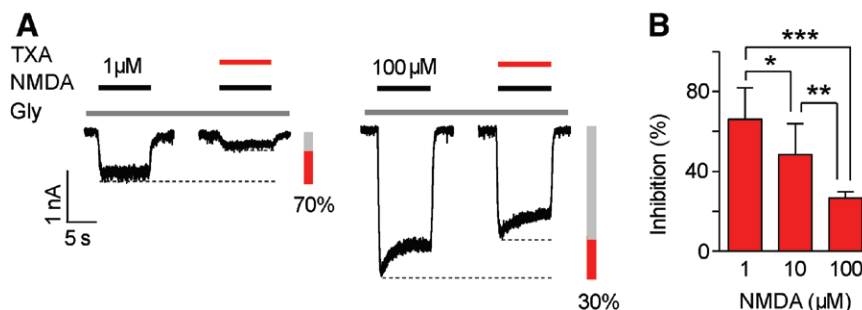

**Fig. 3.** Tranexamic acid (TXA) inhibition of *N*-methyl-D-aspartate (NMDA)-evoked currents is reduced with increasing NMDA concentrations. (A) Representative traces showing decreased effects of TXA (100 mM) on currents evoked by an increased concentration of NMDA. (B) Summarized data for the responses shown in (A) ( $n = 6$ ). Glycine (1 μM) was present continuously in the bath. \* $P < 0.05$ , \*\* $P < 0.01$ , \*\*\* $P < 0.001$ , one-way ANOVA with Dunnett multiple-comparison *post hoc* test. All data are presented as mean  $\pm$  SD.



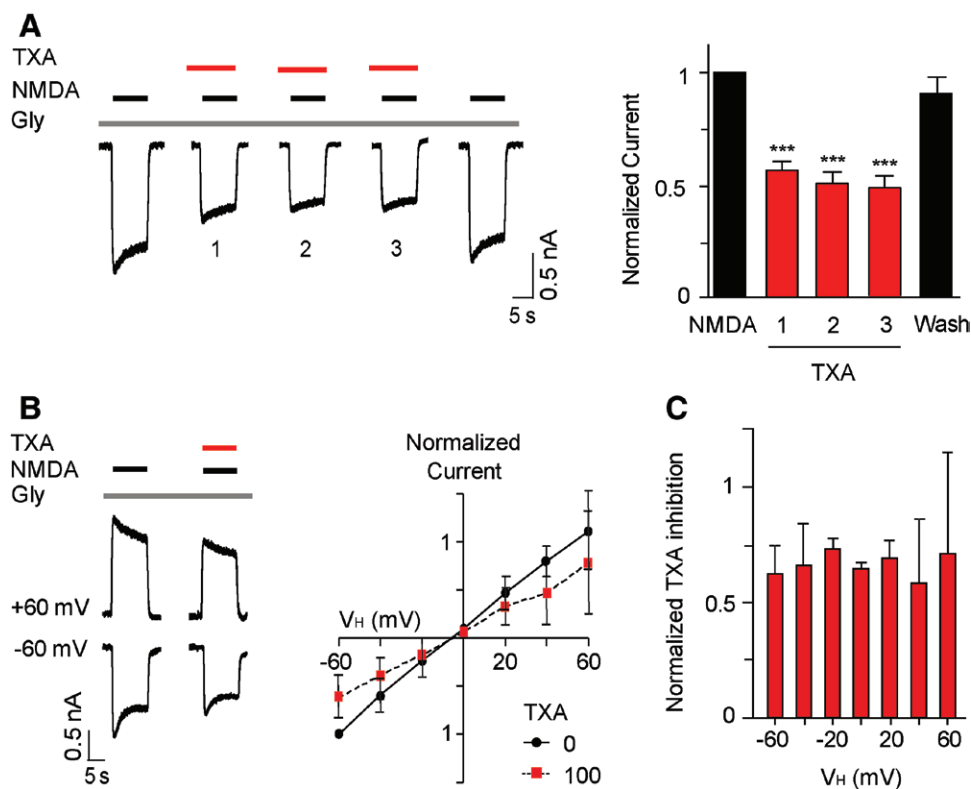

**Fig. 4.** Tranexamic acid (TXA) inhibition of *N*-methyl-D-aspartate (NMDA) currents is not use and voltage dependent. (A) Repeated application of TXA (100 mM) did not cause a statistically significant increase in blockade of currents evoked by NMDA (100  $\mu$ M). Currents recorded during the sequential application of TXA are identified as 1, 2, and 3. The bar graph shows mean peak amplitude of the current recorded with and without coapplication of TXA ( $n = 5$ ). \*\*\* $P < 0.001$  versus NMDA, one-way ANOVA with Dunnett multiple-comparison *post hoc* test. (B and C) Representative traces and summarized data showing the inhibitory effects of TXA (100 mM) on currents evoked by NMDA (100  $\mu$ M) at different holding potentials ( $V_H$ ). For current-voltage ( $I$ - $V$ ) plots in (B), the currents were normalized to the peak current induced by NMDA without TXA at a holding potential of  $-60$  mV. The sample sizes for the  $I$ - $V$  plot in the absence and presence of TXA were  $n = 9$  and  $n = 7$ , respectively. In (C), note that TXA-induced inhibition of NMDA currents was similar for all holding potentials.  $P = 0.8$ , one-way ANOVA with Dunnett multiple-comparison *post hoc* test. For all recordings, glycine (1  $\mu$ M) was continuously in the bath. All data are presented as mean  $\pm$  SD.

pulses by TXA was similar ( $78.9 \pm 10.3\%$  with 95% CI, 69.9 to 87.9;  $78.5 \pm 9.6\%$  with 95% CI, 70.1 to 86.9; and  $79.8 \pm 9.8\%$  with 95% CI, 71.2 to 88.4; respectively,  $n = 5$ ;  $P = 0.5$ , one-way ANOVA). These results further indicate that TXA inhibition of NMDA receptors was not use dependent. To determine whether TXA-mediated inhibition was voltage dependent, NMDA currents were recorded at different holding potentials in the absence or presence of TXA (100 mM) and current-voltage plots were constructed. TXA decreased the slope of the current-voltage plot but did not change the reversal potential (NMDA:  $-5.2$  mV, +TXA:  $-5.5$  mV,  $P = 0.9$ ; fig. 4B). Moreover, the extent of TXA-induced inhibition of NMDA currents was equivalent at holding potentials between  $-60$  and  $+60$  mV ( $P = 0.8$ , fig. 4C). Thus, TXA inhibition of NMDA currents was not voltage dependent.

#### High Concentrations of TXA Inhibit AMPA and Kainate Receptors

Unlike NMDA receptors, AMPA receptors and kainate receptors do not require the binding of the co-agonist

glycine to promote channel opening. Thus, we hypothesized that TXA would not inhibit AMPA and kainate receptor function. To test this hypothesis, AMPA and kainate were first applied to the neurons to determine  $EC_{50}$  values (fig. 5, A and B). Next, the inhibitory effects of TXA on currents evoked by AMPA (10  $\mu$ M) and kainate (20  $\mu$ M), applied at concentrations close to the  $EC_{50}$  values, were studied. Contrary to what was predicted, TXA caused concentration-dependent inhibition of both AMPA- and kainate-evoked currents, with  $IC_{50}$  values of  $231 \pm 91$  mM (95% CI, 148 to 314;  $n = 5$  to 6; fig. 5C) and  $90 \pm 24$  mM (95% CI, 68 to 112;  $n = 5$ ; fig. 5D), respectively. TXA blockade was rapid and was completely reversed after drug washout.

#### Discussion

The results show that TXA inhibited ionotropic glutamate receptors, but only at high millimolar concentrations. The efficacy of TXA inhibition of NMDA receptors depended on the concentrations of glycine and NMDA, and the blockade was neither use dependent nor voltage dependent. TXA also

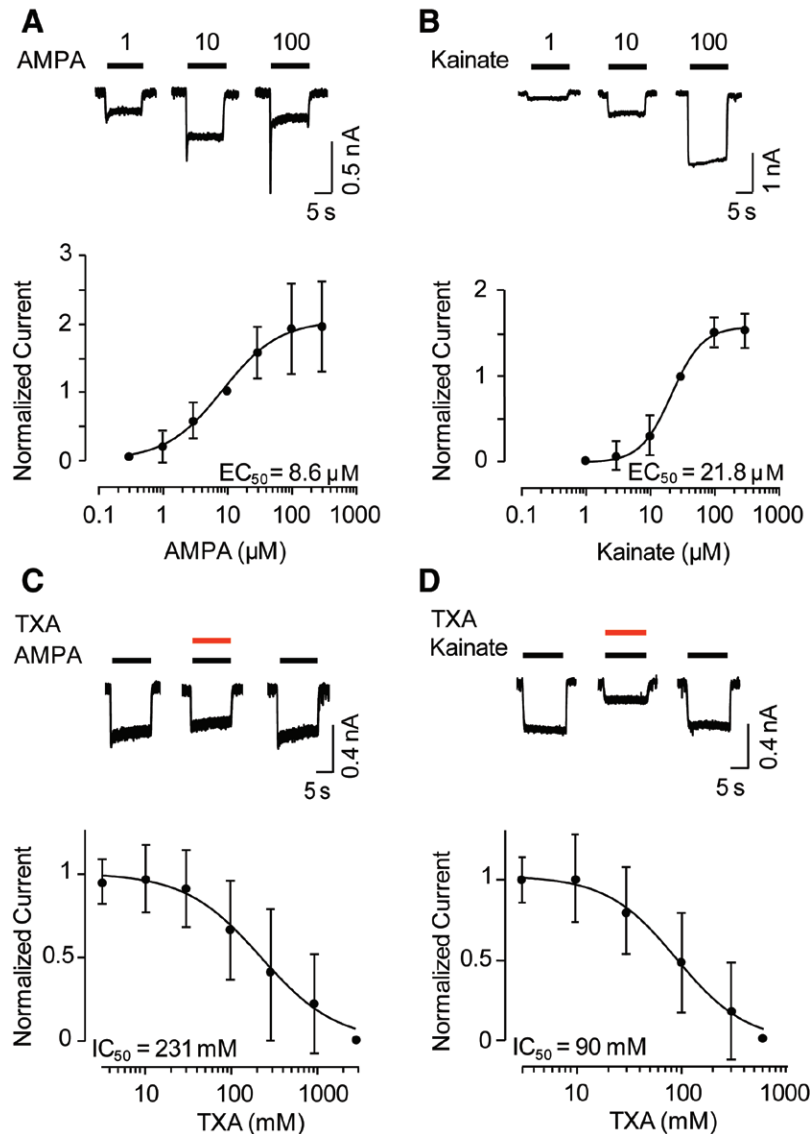

**Fig. 5.** Tranexamic acid (TXA) inhibits  $\alpha$ -amino-3-hydroxy-5-methyl-4-isoxazolepropionic acid (AMPA)- and kainate-evoked currents. (A and B) Representative traces and the concentration–response plots for currents evoked by (A) AMPA and (B) kainate. The half maximal effective concentration was  $8.6 \pm 4.0$   $\mu$ M (95% CI, 5.2 to 12.0) for AMPA responses and  $21.8 \pm 3.6$   $\mu$ M (95% CI, 18.3 to 25.3) for kainate responses. The sample sizes for 0.3 to 10, 30 to 100, and 300  $\mu$ M AMPA were  $n = 6$ ,  $n = 5$ , and  $n = 4$ , respectively. The sample size for kainate was  $n = 4$ . (C and D) Representative traces and the corresponding concentration–response plots demonstrating the inhibitory effects of TXA on currents induced by AMPA (10  $\mu$ M, C) and kainate (20  $\mu$ M, D). The sample sizes for 3 to 100 mM and 300 to 3,000 mM TXA on AMPA currents were  $n = 6$  and  $n = 5$ , respectively. The sample sizes for TXA on kainate currents were  $n = 5$ . All data are presented as mean  $\pm$  SD.

inhibited AMPA and kainate receptors at concentrations that are similar to those that inhibited NMDA receptors.

These results build on two previous studies that examined the effects of TXA on glutamate receptor function.<sup>18,25</sup> In one of these studies, electrophysiologic recordings showed that TXA did not inhibit excitatory currents in amygdala slices, but only low millimolar concentrations were studied.<sup>25</sup> More specifically, TXA concentrations less than 10 mM did not modify synaptic currents generated by glutamate receptors.<sup>25</sup> These findings are consistent with our results. In the second study, TXA, at concentrations up to 10 mM, did not bind to NMDA receptors

in rat cortical tissue.<sup>18</sup> However, the experimental conditions used in the study did not favor TXA binding as the extracellular solution contained high concentrations of NMDA and glycine. TXA blockade of NMDA receptors is reduced under these conditions, possibly because of a competitive interaction between glycine and TXA at the NMDA receptor.

The results from our electrophysiologic studies do not discern whether TXA binds directly to NMDA receptors or indirectly reduces receptor function. However, several lines of evidence suggest that TXA inhibits NMDA receptors directly by preventing glycine from acting as a full co-agonist at these receptors. First,

high extracellular concentrations of glycine reduce TXA blockade. Second, TXA shifts the glycine concentration–response plot to the right without reducing the maximal NMDA-evoked current response. Third, TXA inhibition of NMDA receptors is not use dependent or voltage dependent, which suggests that TXA lacks the features of steric blockers, such as magnesium and ketamine, which occlude the open channel pore.<sup>39–41</sup>

Interestingly, increasing the concentration of NMDA reduced TXA inhibition of NMDA receptors. This result is consistent with evidence indicating that glutamate and glycine binding to the NMDA receptors is allosterically coupled.<sup>36,37</sup> Glutamate agonists increase [<sup>3</sup>H]glycine binding, whereas glutamate antagonists decrease [<sup>3</sup>H]glycine binding.<sup>37</sup> Reciprocally, competitive antagonists at the glycine binding site allosterically reduce glutamate binding.<sup>36</sup> Increasing the concentration of NMDA likely increases glycine affinity, thereby reducing TXA inhibition.

TXA also inhibits AMPA receptors and kainate receptors. These results were unexpected, given that the AMPA and kainate receptors lack a glycine binding site.<sup>22</sup> However, TXA inhibits other transmitter-gated ion channels that lack a glycine binding site, including  $\gamma$ -aminobutyric acid type A receptors.<sup>14,18,25</sup> It remains unknown how TXA inhibits AMPA and kainate receptors, and further studies are required to determine whether inhibition results from steric, allosteric, or other indirect mechanisms.

Although we examined the TXA sensitivity of glutamate receptors expressed in central neurons, the receptors expressed in peripheral tissues are more likely to be exposed to high millimolar concentrations of TXA. Nevertheless, ionotropic glutamate receptors in peripheral tissues and central neurons exhibit similar structural, kinetic, and pharmacologic properties, suggesting that the results are clinically relevant.<sup>26,28,31</sup> For example, in both central neurons and peripheral tissues, GluN1 and GluN2 subunits form functional NMDA receptors.<sup>28,31</sup> Also, current generated by glutamate receptors in bone and heart tissue exhibits kinetic and pharmacologic sensitivities that are similar to those of glutamate receptors in neurons.<sup>26,28</sup> For example, NMDA receptors in bone cells and neurons are inhibited by both magnesium ions and the high-affinity antagonist MK-801,<sup>26</sup> suggesting that receptors expressed in neurons and nonneuronal tissues likely exhibit similar sensitivity to TXA.

High concentrations of TXA that inhibit glutamate receptors could occur after topical application of the drug. Glutamate receptors expressed in peripheral tissues would be exposed to such high concentrations. For example, topical application of TXA is used commonly during orthopedic surgery.<sup>17,42–45</sup> NMDA receptors composed of GluN1 and GluN2A-D are expressed in osteoblasts and osteoclasts in bone.<sup>28,31</sup> As such, TXA inhibition of NMDA receptors could alter bone healing. Furthermore, receptor subunits of NMDA (GluN1 and GluN2), AMPA (GluA2 and GluA3), and kainate (GluK1 and GluK2) are expressed in the heart, pancreas, and gastrointestinal tissue.<sup>28–30,46</sup> Cardiac glutamate receptors, which are localized preferentially within the conducting system, the nerve

terminals, and the intramural ganglia cells,<sup>27</sup> are involved in conducting impulses and rhythm control.<sup>27,47</sup> It is plausible that topical application of TXA to the heart's conducting system could cause dysrhythmias. Inhibition of NMDA receptors in human and mouse pancreatic islets increases secretion of insulin, so receptor inhibition by TXA could alter glucose levels.<sup>48</sup> Finally, inhibition of NMDA receptors in peripheral nerves alters nociception in both rodents and humans.<sup>49</sup>

Awareness of such potential “off-target” effects secondary to TXA effects on glutamate receptors will inform studies that seek to identify adverse effects of topically applied TXA in patients. Clinical studies first focused on the adverse consequences of antifibrinolytic effects of TXA, including deep vein thrombosis, stroke, and myocardial infarction.<sup>50–53</sup> Side effects due to off-target receptor effects only have been recognized recently. For example, seizure and myoclonus likely due to TXA inhibition of glycine receptors and  $\gamma$ -aminobutyric acid type A receptors and mechanistically based treatments for those seizures only have been identified recently.<sup>19</sup> By analogy, the physiologic roles of glutamate receptors expressed in peripheral tissues are only beginning to be understood. It will be worthwhile, in future studies, to determine whether TXA inhibition of such physiologic functions contributes to adverse effects of TXA.

In summary, high concentrations of TXA inhibit ionotropic glutamate receptors. These preclinical results will support future studies aiming to clarify the safety and consequences of applying TXA topically to nonneuronal tissues and peripheral nerves in patients.

## Acknowledgments

The authors thank Ella Czerwinska, M.Sc., and Junhui Wang, M.D., Ph.D., Department of Physiology, University of Toronto, Toronto, Ontario, Canada, for their assistance with the cell cultures.

## Research Support

This work was supported by operating grants from the Canadian Institutes of Health Research (CIHR), Ottawa, Ontario, Canada, to Dr. Orser (grant Nos.: 416838, 480143). Dr. Lecker was supported by the Frederick Banting and Charles Best Doctoral Scholarship from CIHR. K. Kaneshwaran was supported by the Kirk Weber Award in Anesthesia from the Department of Anesthesia, Sunnybrook Health Services Centre, Toronto, Ontario, Canada; and the Ontario Graduate Scholarship, Ontario, Canada.

## Competing Interests

The authors declare no competing interests.

## Correspondence

Address correspondence to Dr. Orser: Department of Physiology, University of Toronto, Toronto, Ontario, M5S 1A8, Canada. [beverley.orser@utoronto.ca](mailto:beverley.orser@utoronto.ca). Information on purchasing reprints may be found at [www.anesthesiology.org](http://www.anesthesiology.org) or on the masthead page at the beginning of this issue. ANESTHESIOLOGY's articles are made freely accessible to all readers, for personal use only, 6 months from the cover date of the issue.

## References

- Henry DA, Carless PA, Moxey AJ, O'Connell D, Stokes BJ, Fergusson DA, Ker K: Anti-fibrinolytic use for minimising perioperative allogeneic blood transfusion. *Cochrane Database Syst Rev* 2011;CD001886
- Ker K, Beecher D, Roberts I: Topical application of tranexamic acid for the reduction of bleeding. *Cochrane Database Syst Rev* 2013;CD010562
- Leminen H, Hurskainen R: Tranexamic acid for the treatment of heavy menstrual bleeding: Efficacy and safety. *Int J Womens Health* 2012; 4:413–21
- Morrison JJ, Dubose JJ, Rasmussen TE, Midwinter MJ: Military Application of Tranexamic Acid in Trauma Emergency Resuscitation (MATTERS) study. *Arch Surg* 2012; 147:113–9
- Park KJ, Couch CG, Edwards PK, Siegel ER, Mears SC, Barnes CL: Tranexamic acid reduces blood transfusions in revision total hip arthroplasty. *J Arthroplasty* 2016; 31:2850–2855.e1
- Roberts I, Shakur H, Afolabi A, Brohi K, Coats T, Dewan Y, Gando S, Guyatt G, Hunt BJ, Morales C, Perel P, Prieto-Merino D, Woolley T: The importance of early treatment with tranexamic acid in bleeding trauma patients: An exploratory analysis of the CRASH-2 randomised controlled trial. *Lancet* 2011; 377:1096–101
- Sharma V, Fan J, Jerath A, Pang KS, Bojko B, Pawliszyn J, Karski JM, Yau T, McCluskey S, Wasowicz M: Pharmacokinetics of tranexamic acid in patients undergoing cardiac surgery with use of cardiopulmonary bypass. *Anaesthesia* 2012; 67:1242–50
- Simonazzi G, Bisulli M, Saccone G, Moro E, Marshall A, Berghella V: Tranexamic acid for preventing postpartum blood loss after cesarean delivery: A systematic review and meta-analysis of randomized controlled trials. *Acta Obstet Gynecol Scand* 2016; 95:28–37
- Hoylaerts M, Lijnen HR, Collen D: Studies on the mechanism of the antifibrinolytic action of tranexamic acid. *Biochim Biophys Acta* 1981; 673:75–85
- Abou-Diwan C, Sniecinski RM, Szlam F, Ritchie JC, Rhea JM, Tanaka KA, Molinaro RJ: Plasma and cerebral spinal fluid tranexamic acid quantitation in cardiopulmonary bypass patients. *J Chromatogr B Analyt Technol Biomed Life Sci* 2011; 879:553–6
- Dowd NP, Karski JM, Cheng DC, Carroll JA, Lin Y, James RL, Butterworth J: Pharmacokinetics of tranexamic acid during cardiopulmonary bypass. *ANESTHESIOLOGY* 2002; 97:390–9
- Fiechtner BK, Nuttall GA, Johnson ME, Dong Y, Sujirattanawimol N, Oliver WC Jr, Sarpal RS, Oyen LJ, Ereth MH: Plasma tranexamic acid concentrations during cardiopulmonary bypass. *Anesth Analg* 2001; 92:1131–6
- Grassin-Delye S, Tremey B, Abe E, Fischler M, Alvarez JC, Devillier P, Urien S: Population pharmacokinetics of tranexamic acid in adults undergoing cardiac surgery with cardiopulmonary bypass. *Br J Anaesth* 2013; 111:916–24
- Lecker I, Wang DS, Romaschin AD, Peterson M, Mazer CD, Orser BA: Tranexamic acid concentrations associated with human seizures inhibit glycine receptors. *J Clin Invest* 2012; 122:4654–66
- Almer S, Andersson T, Ström M: Pharmacokinetics of tranexamic acid in patients with ulcerative colitis and in healthy volunteers after the single instillation of 2g rectally. *J Clin Pharmacol* 1992; 32:49–54
- Sindet-Pedersen S: Distribution of tranexamic acid to plasma and saliva after oral administration and mouth rinsing: A pharmacokinetic study. *J Clin Pharmacol* 1987; 27:1005–8
- Wong J, Abrishami A, El Beheiry H, Mahomed NN, Roderick Davey J, Gandhi R, Syed KA, Muhammad Ovais Hasan S, De Silva Y, Chung F: Topical application of tranexamic acid reduces postoperative blood loss in total knee arthroplasty: A randomized, controlled trial. *J Bone Joint Surg Am* 2010; 92:2503–13
- Furtmüller R, Schlag MG, Berger M, Hopf R, Huck S, Sieghart W, Redl H: Tranexamic acid, a widely used antifibrinolytic agent, causes convulsions by a  $\gamma$ -aminobutyric acid<sub>A</sub> receptor antagonistic effect. *J Pharmacol Exp Ther* 2002; 301:168–73
- Lecker I, Wang DS, Whissell PD, Avramescu S, Mazer CD, Orser BA: Tranexamic acid-associated seizures: Causes and treatment. *Ann Neurol* 2016; 79:18–26
- Pellegrini A, Giaretta D, Chemello R, Zanotto L, Testa G: Feline generalized epilepsy induced by tranexamic acid (AMCA). *Epilepsia* 1982; 23:35–45
- Schlag MG, Hopf R, Redl H: Convulsive seizures following subdural application of fibrin sealant containing tranexamic acid in a rat model. *Neurosurgery* 2000; 47:1463–7
- Traynelis SF, Wollmuth LP, McBain CJ, Menniti FS, Vance KM, Ogden KK, Hansen KB, Yuan H, Myers SJ, Dingledine R: Glutamate receptor ion channels: Structure, regulation, and function. *Pharmacol Rev* 2010; 62:405–96
- Johnson JW, Ascher P: Glycine potentiates the NMDA response in cultured mouse brain neurons. *Nature* 1987; 325:529–31
- Kauer JA, Malenka RC, Nicoll RA: NMDA application potentiates synaptic transmission in the hippocampus. *Nature* 1988; 334:250–2
- Kratzer S, Irl H, Mattusch C, Bürge M, Kurz J, Kochs E, Eder M, Rammes G, Haseneder R: Tranexamic acid impairs  $\gamma$ -aminobutyric acid receptor type A-mediated synaptic transmission in the murine amygdala: A potential mechanism for drug-induced seizures? *ANESTHESIOLOGY* 2014; 120:639–49
- Espinosa L, Itzstein C, Cheynel H, Delmas PD, Chenu C: Active NMDA glutamate receptors are expressed by mammalian osteoclasts. *J Physiol* 1999; 518:47–53
- Gill S, Veinot J, Kavanagh M, Pulido O: Human heart glutamate receptors—implications for toxicology, food safety, and drug discovery. *Toxicol Pathol* 2007; 35:411–7
- Gill SS, Pulido OM: Glutamate receptors in peripheral tissues: Current knowledge, future research, and implications for toxicology. *Toxicol Pathol* 2001; 29:208–23
- Gill SS, Pulido OM, Mueller RW, McGuire PF: Molecular and immunochemical characterization of the ionotropic glutamate receptors in the rat heart. *Brain Res Bull* 1998; 46:429–34
- Inagaki N, Kuromi H, Gono T, Okamoto Y, Ishida H, Seino Y, Kaneko T, Iwanaga T, Seino S: Expression and role of ionotropic glutamate receptors in pancreatic islet cells. *FASEB J* 1995; 9:686–91
- Itzstein C, Espinosa L, Delmas PD, Chenu C: Specific antagonists of NMDA receptors prevent osteoclast sealing zone formation required for bone resorption. *Biochem Biophys Res Commun* 2000; 268:201–9
- Skerry TM, Genever PG: Glutamate signalling in non-neuronal tissues. *Trends Pharmacol Sci* 2001; 22:174–81
- Eshhar N, Petralia RS, Winters CA, Niedzielski AS, Wenthold RJ: The segregation and expression of glutamate receptor subunits in cultured hippocampal neurons. *Neuroscience* 1993; 57:943–64
- MacDonald JF, Mody I, Salter MW, Pennefather P, Schneiderman JH: The regulation of NMDA receptors in the central nervous system. *Prog Neuropsychopharmacol Biol Psychiatry* 1989; 13:481–8
- Kaech S, Banker G: Culturing hippocampal neurons. *Nat Protoc* 2006; 1:2406–15
- Grimwood S, Kulagowski JJ, Mawer IM, Rowley M, Leeson PD, Foster AC: Allosteric modulation of the glutamate site on the NMDA receptor by four novel glycine site antagonists. *Eur J Pharmacol* 1995; 290:221–6
- Lester RA, Tong G, Jahr CE: Interactions between the glycine and glutamate binding sites of the NMDA receptor. *J Neurosci* 1993; 13:1088–96



38. MacDonald JF, Miljkovic Z, Pennefather P: Use-dependent block of excitatory amino acid currents in cultured neurons by ketamine. *J Neurophysiol* 1987; 58:251–66
39. MacDonald JF, Wojtowicz JM: Two conductance mechanisms activated by applications of L-glutamic, L-aspartic, DL-homocysteic, N-methyl-D-aspartic, and DL-kainic acids to cultured mammalian central neurones. *Can J Physiol Pharmacol* 1980; 58:1393–7
40. Mayer ML, Westbrook GL, Guthrie PB: Voltage-dependent block by  $Mg^{2+}$  of NMDA responses in spinal cord neurones. *Nature* 1984; 309:261–3
41. Nowak L, Bregestovski P, Ascher P, Herbet A, Prochiantz A: Magnesium gates glutamate-activated channels in mouse central neurones. *Nature* 1984; 307:462–5
42. Sun X, Dong Q, Zhang YG: Intravenous *versus* topical tranexamic acid in primary total hip replacement: A systemic review and meta-analysis. *Int J Surg* 2016; 32:10–8
43. Tzatzairis TK, Drosos GI, Kotsios SE, Ververidis AN, Vogiatzaki TD, Kazakos KI: Intravenous vs topical tranexamic acid in total knee arthroplasty without tourniquet application: A randomized controlled study. *J Arthroplasty* 2016; 31:2465–70
44. Uğurlu M, Aksekili MA, Çağlar C, Yüksel K, Şahin E, Akyol M: Effect of topical and intravenously applied tranexamic acid compared to control group on bleeding in primary unilateral total knee arthroplasty. *J Knee Surg* 2017; 30:152–7
45. Wang H, Shen B, Zeng Y: Blood loss and transfusion after topical tranexamic acid administration in primary total knee arthroplasty. *Orthopedics* 2015; 38:e1007–16
46. Tsai LH, Tsai W, Wu JY: Effect of L-glutamic acid on acid secretion and immunohistochemical localization of glutamatergic neurons in the rat stomach. *J Neurosci Res* 1994; 38:188–95
47. Huang CF, Su MJ: Positive inotropic action of NMDA receptor antagonist (+)-MK801 in rat heart. *J Biomed Sci* 1999; 6:387–98
48. Marquard J, Otter S, Welters A, Stirban A, Fischer A, Eglinger J, Herebian D, Kletke O, Klemen MS, Stožer A, Wnendt S, Piemonti L, Köhler M, Ferrer J, Thorens B, Schliess F, Rupnik MS, Heise T, Berggren PO, Klöcker N, Meissner T, Mayatepek E, Eberhard D, Kragl M, Lammert E: Characterization of pancreatic NMDA receptors as possible drug targets for diabetes treatment. *Nat Med* 2015; 21:363–72
49. Cairns BE, Svensson P, Wang K, Hupfeld S, Graven-Nielsen T, Sessle BJ, Berde CB, Arendt-Nielsen L: Activation of peripheral NMDA receptors contributes to human pain and rat afferent discharges evoked by injection of glutamate into the masseter muscle. *J Neurophysiol* 2003; 90:2098–105
50. Garg J, Pinnamaneni S, Aronow WS, Ahmad H: ST elevation myocardial infarction after tranexamic acid: First reported case in the United States. *Am J Ther* 2014; 21:e221–4
51. Nardi K, Pelone G, Bartolo M, Di Ruzza MR, Storto M, Notte A, Grillea G, Colonnese C, Lembo G, Vecchione C: Ischaemic stroke following tranexamic acid in young patients carrying heterozygosity of MTHFR C677T. *Ann Clin Biochem* 2011; 48(Pt 6):575–8
52. Sundström A, Seaman H, Kieler H, Alfredsson L: The risk of venous thromboembolism associated with the use of tranexamic acid and other drugs used to treat menorrhagia: A case-control study using the General Practice Research Database. *BJOG* 2009; 116:91–7
53. Taparia M, Cordingley FT, Leahy MF: Pulmonary embolism associated with tranexamic acid in severe acquired haemophilia. *Eur J Haematol* 2002; 68:307–9
